# Supplementary material for: HMGB1 Promotes Intraoral Palatal Wound Healing through RAGE-Dependent Mechanisms
Source: MDPI journal article supplement (doi:10.3390/ijms17111961), 2016-11-23
Supplement: s1 [file s1]

# Supplementary Materials: HMGB1 Promotes Intraoral Palatal Wound Healing through RAGE-Dependent Mechanisms

Salunya Tancharoen, Satoshi Gando, Shrestha Binita, Tomoka Nagasato, Kiyoshi Kikuchi, Yuko Nawa, Pornpen Dararat, Mika Yamamoto, Somphong Narkpinit and Ikuro Maruyama

A

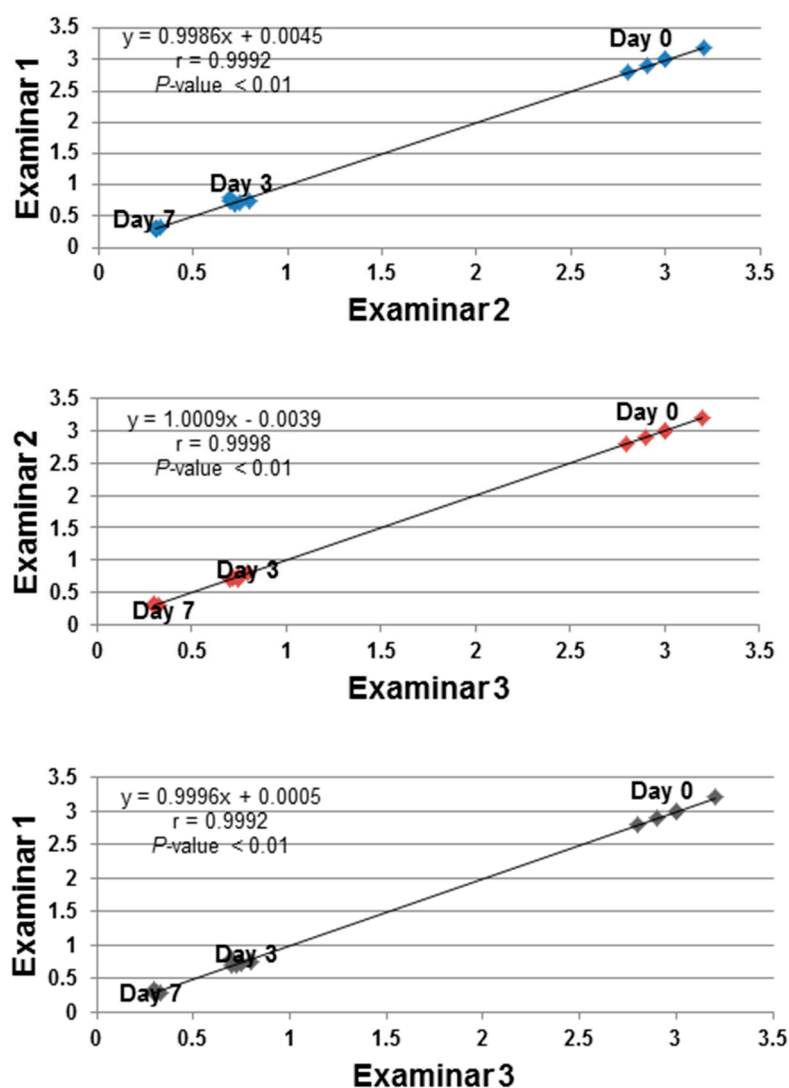

Figure S1. Cont.

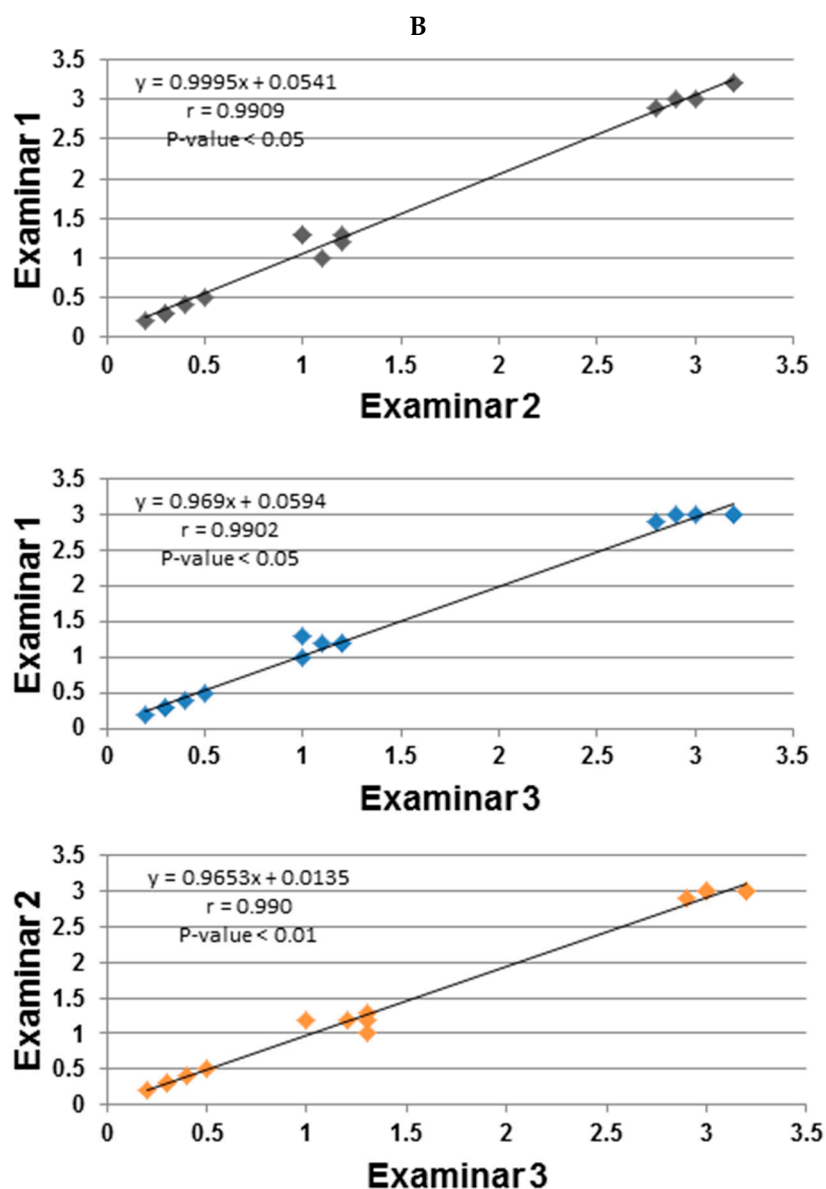

**Figure S1.** Inter-examiner reliability of wound area measurement. The average values of wound areas on days 0, 3, and 7 in (A) WT and (B) *Hmgb1*<sup>+/-</sup> mice were measured by three examiners. Pearson's correlation coefficient (*r*) values between the examiners and *p* values are shown. *p* value < 0.05 was considered statistically significant.

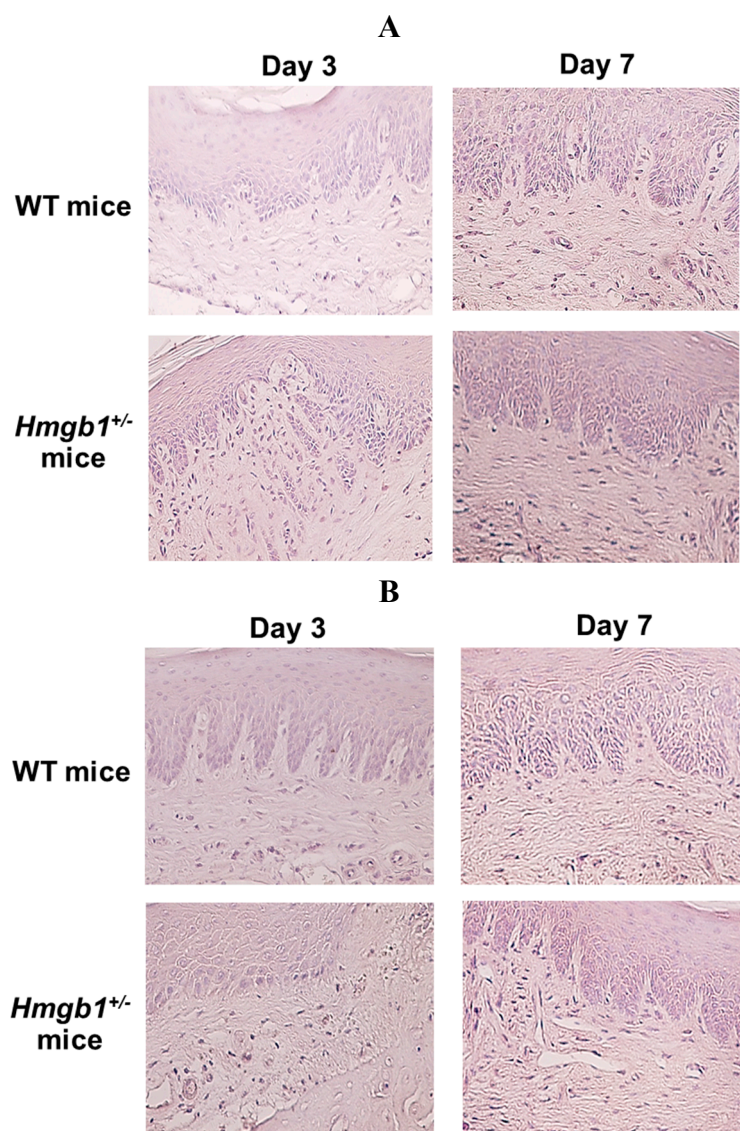

**Figure S2.** Analysis of antibody specificity in immunohistochemistry study. The palatal wound samples of *Hmgb1*<sup>+/-</sup> mice and WT mice after day 3 and day 7-post surgery were immunostained with anti-rabbit IgG at (A) 1:200 and (B) 1:500 dilution. No positive staining of the tissues in *Hmgb1*<sup>+/-</sup> mice or WT mice samples. All images were obtained at 400× magnification.
